# Supplementary material
Source: PubMed Central journal article supplement (PMC11203181)

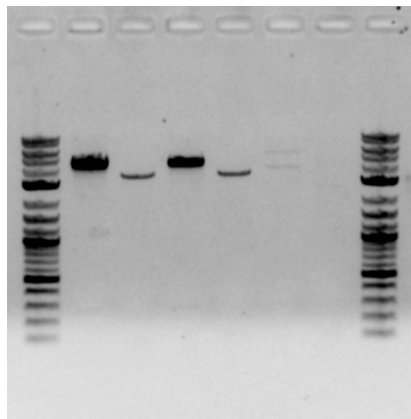

The images below are *Shh* whole-mount in situ hybridization in E10.5 wild type embryos

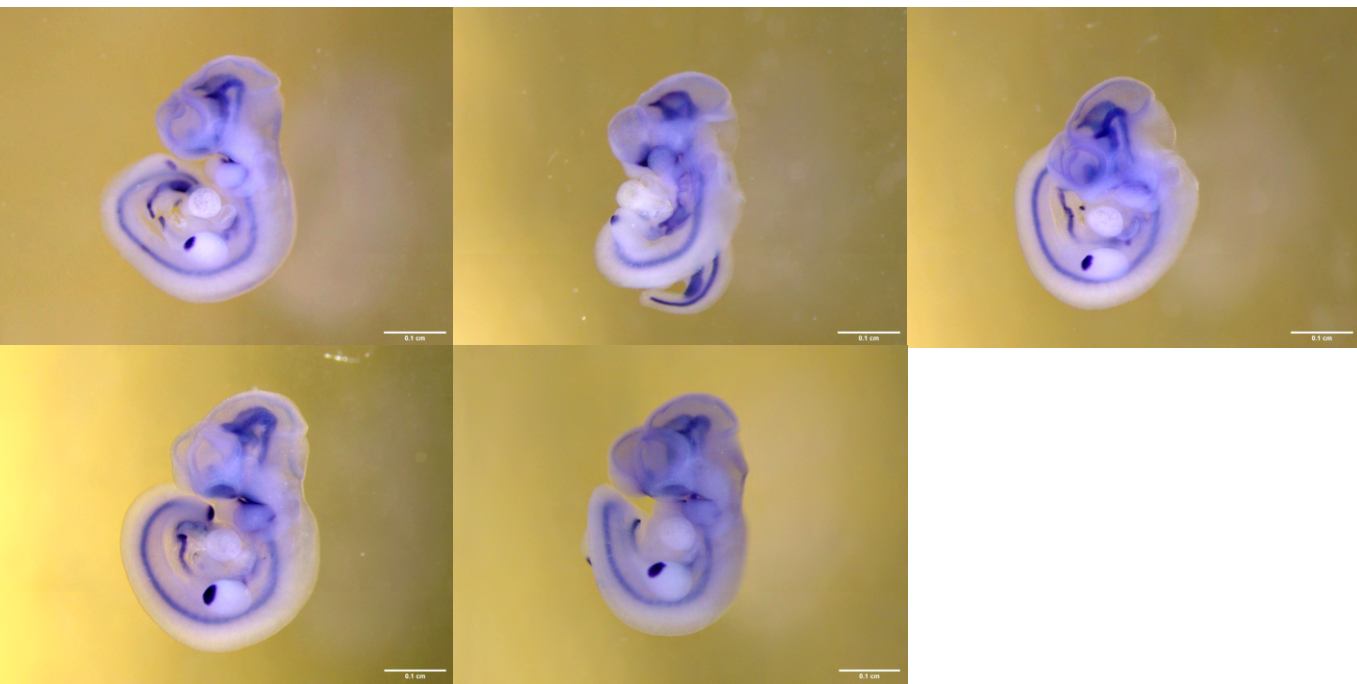

The images below are *Shh* whole-mount in situ hybridization in E10.5 ZRS<sup>lacZ/lacZ</sup> embryos

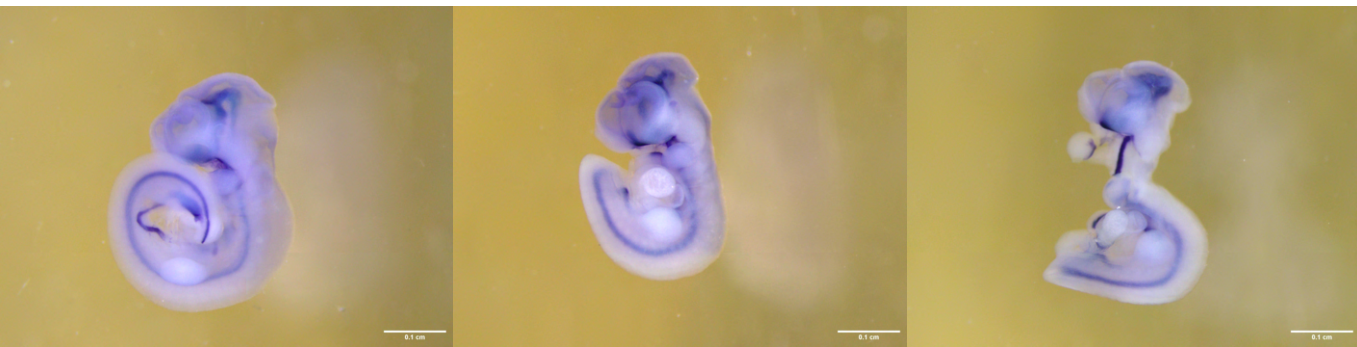

Supplement: NIHMS1989768-supplement-Source_Data_Extended_Data_Fig__9.pdf [file NIHMS1989768-supplement-Source_Data_Extended_Data_Fig__9.pdf]
