# Supplementary material
Source: PubMed Central journal article supplement (PMC11203181)

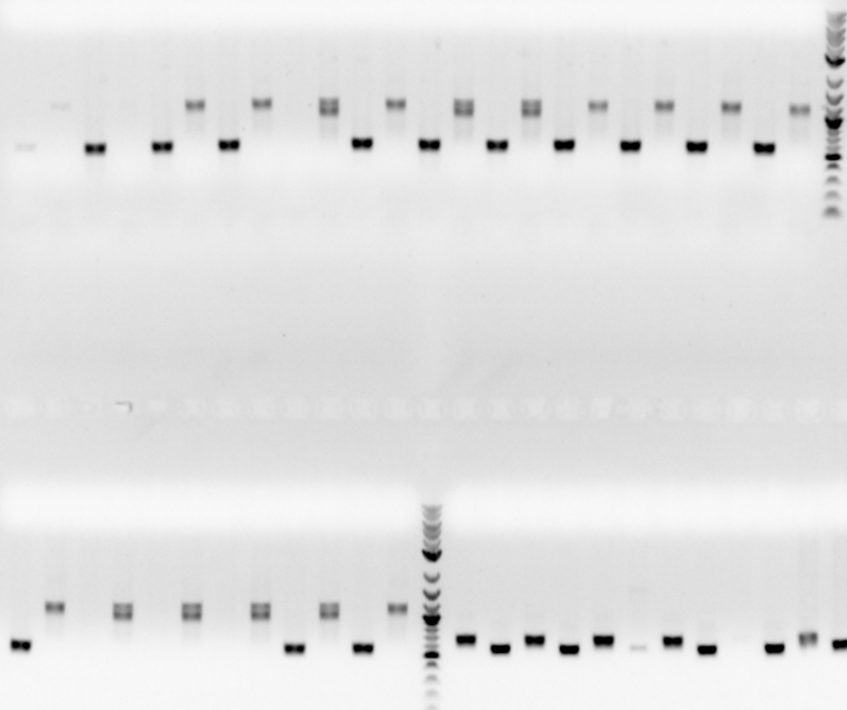

Supplement: NIHMS1989768-supplement-Source_Data_Extended_Data_Fig__5.pdf [file NIHMS1989768-supplement-Source_Data_Extended_Data_Fig__5.pdf]
